1     **Dysbiosis personalizes fitness effect of antibiotic resistance in the**  
2                                                   **mammalian gut**

3  
4     Luís Leónidas Cardoso<sup>1†</sup>, Paulo Durão<sup>1†</sup>, Massimo Amicone<sup>1†</sup>, Isabel Gordo<sup>1\*</sup>

5     <sup>†</sup>These authors contributed equally to this work

6     <sup>1</sup>Instituto Gulbenkian de Ciência, Oeiras, Portugal

7     \*Correspondence: igordo@igc.gulbenkian.pt

8     **One Sentence Summary:** Personalized Fitness of Resistance Mutations.

9

10    **SUMMARY**

11    The fitness cost of antibiotic resistance in the absence of antibiotics is crucial to the  
12    success of suspending antibiotics as a strategy to lower resistance. Here we show that  
13    after antibiotic treatment the cost of resistance within the complex ecosystem of the  
14    mammalian gut is personalized. Using mice as an *in vivo* model, we find that the  
15    fitness effect of the same resistant mutation can be deleterious in a host, but neutral or  
16    even beneficial in other hosts. Such antagonistic pleiotropy is shaped by the  
17    microbiota, as in germ-free mice resistance is consistently costly across all hosts. An  
18    eco-evolutionary model of competition for resources identifies a general mechanism  
19    underlying between host variation and predicts that the dynamics of compensatory  
20    evolution of resistant bacteria should be host specific, a prediction that was supported  
21    by experimental evolution *in vivo*. The microbiome of each human is close to unique  
22    and our results suggest that the short-term costs of resistance and its long-term within-  
23    host evolution will also be highly personalized, a finding that may contribute to the  
24    observed variable outcome of control therapies.

25

## 26 INTRODUCTION

27 Antibiotic resistance (AR) is a growing challenge in the treatment of infectious  
28 diseases which are projected to become a burden worldwide in the coming decades<sup>1</sup>.

29 The set of AR genes and AR mutations – called resistomes – is widespread in  
30 clinical<sup>2,3</sup> and environmental<sup>4,5</sup> settings, providing a reservoir that can further expand  
31 by horizontal gene transfer. Commensal bacteria can carry AR in healthy individuals  
32 and AR can persist in the human gut for years<sup>6</sup>.

33 Chromosomal encoded resistance mutations often map onto genes coding for essential  
34 cellular functions, such as transcription, translation, or cell-wall biogenesis (see  
35 e.g.<sup>7,8</sup>). Resistance tends to be highly epistatic and pleiotropic<sup>9–11</sup> and typically entails  
36 fitness costs in the absence of antibiotics<sup>12–15</sup>. The existence of AR costs predicts that  
37 a susceptible strain should out-compete a resistant strain, and a decrease of resistance  
38 levels to a given antibiotic should occur if the use of that drug is halted in clinical  
39 settings. This strategy should be effective when the cost of resistance is high<sup>16–19</sup>,  
40 allowing for the elimination of the AR strain before evolutionary compensation for  
41 the cost of resistance occurs<sup>8</sup>. Thus, the efficacy of controlling the spread of AR by  
42 suspending the usage of an antibiotic is critically dependent on the relative fitness of  
43 resistant and sensitive genotypes in the absence of antibiotic.

44 The costs of AR are strongly influenced by the environment where bacteria grow,  
45 both in its abiotic (e.g. nutrient availability) and biotic (interactions with other cells)  
46 components<sup>20–22</sup>. Fitness costs of AR can also depend on the genetic background,  
47 including the presence of other resistances, at the level of the core and accessory  
48 genome<sup>9,23,24</sup>. Since the effects of AR mutations have often been measured under  
49 laboratory environments, which lack the multiple interactions likely to be important *in*  
50 *natura*, our understanding of how costly AR can actually be is currently limited. A

51 few studies where pathogens<sup>25–31</sup> were tested during *in vivo* colonization and infection  
52 suggest that fitness costs of AR are not always high in the context of bacterial  
53 colonization or virulence. Yet to the best of our knowledge, no study so far has  
54 analyzed the temporal dynamics of resistant strains colonizing the key ecosystem of  
55 the gut microbiota. In particular, it is currently unclear how the results from *in vitro*  
56 studies or in the context of invasive pathogens are informative about AR in gut  
57 commensal strains, which are by far the main colonizers of a natural complex  
58 ecosystem. Here, we performed *in vivo* competitive fitness assays, mathematical  
59 modeling and *in vivo* experimental evolution to unravel the fitness effects of AR in  
60 commensal *E. coli* colonizing its natural environment.

61

## 62 **RESULTS**

### 63 **Competitive fitness of AR in the mouse gut**

64 We focused on common resistance mutations to streptomycin - Str<sup>R</sup> (*rpsL*<sup>K43T</sup>) and  
65 rifampicin- Rif<sup>R</sup> (*rpoB*<sup>H526Y</sup>), and also studied double resistant clones - Str<sup>R</sup>Rif<sup>R</sup>  
66 (*rpsL*<sup>K43T</sup>*rpoB*<sup>H526Y</sup>). These have been identified in many important pathogens, such  
67 as *Mycobacterium tuberculosis* and Salmonella, and also in pathogenic and  
68 commensal *E. coli*<sup>32–34</sup>.

69 To query how inter-species interactions, present in the natural ecosystem comprising  
70 the mammalian gut, influence the costs of AR, we performed competitive fitness  
71 assays in mice that have a complex microbiota (SPF mice). To mimic conditions  
72 where the rise of AR can occur, mice were given an antibiotic treatment –  
73 streptomycin - for a week (see **Fig. 1a** and **Methods**). Such treatment is known to  
74 cause perturbations in the microbiota species composition and also to break  
75 colonization resistant to *E. coli*<sup>35</sup>, thus increasing the probability that colonization by

76 external strains occurs. To measure the *in vivo* fitness effects of AR and quantify their  
77 costs, which should occur in the absence of antibiotic, we removed the treatment for  
78 two days and then colonized the mice with susceptible and resistant *E. coli* strains  
79 (**Fig. 1a**). Previous studies suggest that streptomycin is quickly removed from mice<sup>36</sup>  
80 and we have experimentally confirmed that streptomycin is absent 2 days after  
81 treatment is stopped, via a biological detection method in the fecal samples (the  
82 developed method has a threshold of detection of  $\approx 2\mu\text{g/ml}$ ) (**Supplementary Fig. 1**).  
83 In agreement, we see variation of costs even when the competition is between two  
84 strains that are resistant to the streptomycin (**Supplementary Fig. 2**).  
85 For most of the competitions, the temporal dynamics of each of the resistant strains in  
86 each mouse, and hence, the fitness effects of AR within a host, were consistent with a  
87 constant selective effect throughout 5 days of colonization (**Fig. 1b**). However, a wide  
88 variation in the temporal dynamics of Log (AR/Susceptible) is observed between each  
89 mouse (**Fig. 1b**). Such variation is not the result of sampling noise but unveils host-  
90 specific fitness effects of AR. Remarkably AR caused a strong deleterious effect in a  
91 particular host, whereas in another host AR did not exhibit a significant cost (**Fig. 1b**  
92 and **Supplementary Table 1**). These results strongly suggest that the elimination of  
93 AR will likely take a very long time to occur, or may not occur at all, in certain hosts.  
94 Frequency dependent selection is unlikely to be the cause of the observed temporal  
95 variation in the frequency of AR between hosts, as the initial frequency of the  
96 resistant strain is not predictive of the resistance fate (**Fig. 1b**). The occurrence of  
97 compensatory mutations, although possible, is also unlikely to explain the observed  
98 variation. Such events would have to be very common and also entail strong  
99 beneficial effects to influence the estimated fitness difference within the 5 day period  
100 studied. Compensatory mutations are also expected to take longer periods to be rise in

101 frequency (see below) and their spread should lead to strong temporal variations in  
102 the frequency of AR strains within each mouse, causing significant deviations from a  
103 simple linear model, a pattern which was not observed. The data strongly suggests  
104 that constant selection against resistance occurs in a host, but selection for resistance  
105 can occur in another host during the 5-day co-colonization period. Such observation  
106 cannot be explained by the occurrence of back-mutations or by mutations that would  
107 render the bacteria sensitive to the antibiotic (**Supplementary Table 2**).

108 To investigate if the presence of a complex microbiota is an important contributor to  
109 the personalized fitness of AR, we performed co-colonization experiments in germ-  
110 free mice. Here the *in vivo* fitness costs of AR are solely derived from intra-strain  
111 competition in the gut and we find much lower variance between these hosts.  
112 Significant fitness costs of each resistant strain were estimated in this *in vivo* but  
113 simpler environment:  $S_{Str}^R / \text{day} = -0.20 (\pm 0.09, 2*SE)$ ,  $S_{Rif}^R / \text{day} = -0.25 (\pm 0.08)$  and  
114  $S_{Str}^R / \text{Rif}^R / \text{day} = -0.44 (\pm 0.10)$  (**Fig. 1c** and **Supplementary Table 3-4**, corresponding to  
115 1 to 2% cost per generation<sup>37</sup>, implying that AR should be eliminated within 50 to 100  
116 generations, in the absence of antibiotics. The fitness effects of AR estimated *in vivo*  
117 are significantly different from those estimated *in vitro* (**Supplementary Fig. 3**).  
118 Indeed none of the commonly used laboratory environments provides a good  
119 predictor to the costs of single AR mutations, in the simplest *in vivo* system lacking a  
120 complex microbiota, nor of their combined effects (see **Supplemental Text** and  
121 **Supplemental Fig. 3**).

122 Having found that the fitness effects of AR are host-specific, we next asked about  
123 their effects at the population level. Taking the cohort of mice studied as a population,  
124 we find that AR is costly on average (**Fig. 1d**), although it is not significant in any of  
125 the cases ( $S_{Str}^R / \text{gen} = -0.02 (\pm 0.04 2SE, n=6)$ ,  $S_{Rif}^R / \text{gen} = -0.02 (\pm 0.02 2SE)$  and

126  $S_{\text{Str}^{\text{R}}_{\text{Rif}^{\text{R}}/\text{gen}} = -0.02 (\pm 0.02 \text{ 2SE})$ . This indicates that all resistance strains would be  
127 difficult to eliminate at the host meta-population level.

128 Characterization of the gut microbiota composition of the cohorts of mice, through  
129 16S rRNA sequencing, showed that antibiotic treatment both reduced the alpha  
130 diversity ( $p < 0.001$ ) and increased substantially the variation of the host microbiota  
131 (**Fig. 1e-f**). These results suggest that the personalized fitness effect of AR likely  
132 results from an interaction between the effect of AR and the microbial gut ecosystem.

133

### 134 **Modeling AR costs within a species rich ecosystem**

135 To understand whether general properties of the microbiota could cause host-specific  
136 effects of mutations we turned to a theoretical model. If most prevalent interactions in  
137 the microbiota are competitive, as suggested by previous analysis<sup>38</sup>, we can use the  
138 MacArthur consumer-resource model, which only assumes competition. This  
139 framework is capable of explaining major diversity patterns of microbial  
140 communities<sup>39</sup>. The model was adapted to quantify the effect of a diverse microbiota  
141 on the relative fitness of an AR mutation (which is costly in the absence of other  
142 species) both analytically and numerically. This theoretical framework seems  
143 appropriate since the resistances studied affect core genes in bacterial metabolism and  
144 alter growth rates in different carbon sources (**Supplementary Fig. 4**). We assume  
145 that bacteria compete for a set of non-essential resources  $S_1, \dots, S_p$  and each species is  
146 defined by their resource consumption rates  $\vec{\alpha}$  in a  $P$ -dimensional phenotypic space  
147 (**Fig. 2a-b**). We start by assuming that the species of the microbiota ( $M$ ) initially  
148 satisfy the conditions for stable coexistence (**Supplementary Text, eq.3**). To quantify  
149 the fitness effect in this context, we assume that a mutant has a phenotypic difference

150 from its parental wild type ( $\vec{\alpha}^{mut} = \vec{\alpha}^{WT} + \vec{\Delta}$ ) such that its overall fitness is impaired  
151 relative to the total amount of resources that the parent could consume ( $\sum_j^P \Delta_j < 0$ ).

152 The selection coefficient in the presence of other species is then given by:

$$s(t) = \sum_j^P S_j \frac{\Delta_j}{e_j(t)} \quad (\text{eq. 1})$$

153 where  $e_j(t) := \sum_{i \in M} n^{(i)}(t) \cdot \alpha_j^{(i)}$  with  $n^{(i)}$  being the concentration of species  $i$ . The  
154 phenotypes modeled here can be thought of as enzymes dynamics,  $e_j(t)$ , as they  
155 represent key functional units likely to be relevant in the competitive environment.  
156 Their abundance in the ecosystem (which is proportional to the density of the species)  
157 can vary over time, especially in the context of a strong perturbation, such as the  
158 antibiotic treatment in our experimental system. From the time-dependent form of  
159 selection in (eq. 1) one can deduce the following results: Firstly, at equilibrium  
160 ( $e_j = S_j \forall j$ ), selection on the traits is additive, constant and independent of the  
161 microbiota composition (**Supplementary Text, eq.7**). However, the presence of a  
162 stable microbiota can amplify or buffer the cost of a mutation, according to its  
163 specific effect (**Fig. 2c, Supplementary Text, eq.8**). Furthermore, the probability that  
164 the cost is buffered increases with the ratio between the traits (**Fig. 2d,**  
165 **Supplementary Text, eq.8-9**). Secondly, when the microbiota ecosystem is pushed  
166 out of equilibrium via a perturbation (e.g. antibiotic treatment), the fate of a  
167 previously deleterious mutation can be significantly altered. Under such conditions,  
168 selection on the mutant becomes host-specific and can be negative, neutral or even  
169 positive in the short-term (**Supplementary Text, eq.10-11**).

170 We performed numerical simulations (see **Supplementary Text**) for the case of 2-  
171 resources to illustrate how the time dynamics predicted by the model may explain the  
172 experimental patterns in **Fig. 1**. The  $\text{Ln}(\text{mutant/susceptible})$  varies in time and

173 depends on the specific mutant (see **Fig. 3**). If a mutation changes two traits but not  
174 their ratio, its fitness cost is independent of the microbiota composition (**Fig. 3a-b**,  
175 Mutant *x*). For a mutation that causes an increase on one trait but a decrease on the  
176 other, the functional content of the ecosystem determines which trait is beneficial or  
177 detrimental and consequently, determines if the mutant is selected for or against (**Fig.**  
178 **3a-b**, Mutants *y* and *z* have opposite fitness effects). Thus the model predicts variable  
179 fitness effects across hosts and reveals how a pleiotropy-dependent mechanism  
180 characteristic of AR mutants, can lead to their increase in frequency in the absence of  
181 antibiotics (**Supplementary Text, eq.11**). Importantly, at longer time scales, as the  
182 whole microbial ecosystem approaches equilibrium, the fitness effects converge  
183 towards a negative value (**Fig. 3c**), which will eventually become constant across all  
184 individuals (**Supplementary Text, eq.7**). These results indicate that an AR mutation,  
185 which affects competition for resources, should exhibit a host-specific fitness effect  
186 during the initial days of competition (**Fig. 1b**), and predict that the AR cost should  
187 become host-independent once the microbiota reach equilibrium within a host.  
188 Importantly, since mode and time for equilibrium to occur are microbiota-dependent  
189 (**Supplementary Figure 5**), one can further predict that the selective pressure for  
190 compensatory mutations should be different across individuals. Thus, the dynamics of  
191 compensation for AR costs should be time-dependent with compensatory mutations  
192 appearing sooner in some hosts and later in others.

193

#### 194 **Compensatory evolution of AR strains**

195 To experimentally test the theoretical prediction of time dependent compensatory  
196 evolution, we followed the long-term evolutionary dynamics of each AR clone  
197 colonizing the gut, after streptomycin treatment. Since the gut microbiota composition



198 is more similar in mice from the same litter than mice from different litters<sup>40,41</sup>, our  
199 colonization experiment follows a design where the same AR background colonizes  
200 two mice from different parents (**Fig. 4A**). Thus, each mouse will likely differ in its  
201 microbiota composition state after antibiotic treatment is stopped (**Fig. 4b**). Analysis  
202 of the 16S rDNA in each colonized mouse indeed confirmed this expectation and  
203 significant differences between mice were found (**Fig. 4b**).

204 We next queried about the evolutionary dynamics of compensatory mutations along  
205 time and between hosts. To identify *bona fide* compensatory mutations we leveraged  
206 on the fact that these AR mutations have been extensively studied *in vitro*, in different  
207 media and bacterial species, and many of their targets have been identified<sup>31,42–44</sup>.

208 Adaptive mutations unrelated to AR can also occur in the mouse gut at the time scale  
209 of weeks<sup>35,45</sup> and many of those can be similar between mice with different  
210 microbiota compositions<sup>37</sup>. We thus expect adaptive mutations to be more similar  
211 across mice than compensatory mutations, which ought to be more specific to the AR  
212 background of the colonizing *E. coli*. Whole genome sequencing of pools of clones  
213 around week 3 and 6 after colonization reveal a temporal signal of compensatory  
214 evolution, and variation in the number of compensatory mutations between hosts. In  
215 the first cohort of mice at least one compensatory mutation could be detected in all  
216 AR backgrounds by the 3<sup>rd</sup> week, whereas in the other cohort of mice no  
217 compensation for Rif<sup>R</sup> or Srt<sup>R</sup>Rif<sup>R</sup> could be detected at this earlier time point (**Fig.**  
218 **4c**). This result is consistent with the expectation that after antibiotic perturbation,  
219 different microbiota compositions will reach equilibrium at different times and thus  
220 selection for the spread of compensatory mutations will be time dependent. Consistent  
221 with this interpretation, by the 6<sup>th</sup> week the number of compensatory mutations  
222 detected increased in three out of the six studied mice. Remarkably no signal of

223 compensatory evolution could be detected in one of the mice from cohort 2, even  
224 though 11 adaptive mutations raised in frequency in the double resistant lineage that  
225 colonized this host after six weeks of colonization (**Fig. 4d-e and Supplemental**  
226 **Table 5**). This data indicates that the cost of double resistance can take a long time to  
227 be expressed in specific hosts.

228 Analysis of the targets of evolutionary change and their frequency with the colonizing  
229 lineages showed that, in the majority of mice, adaptive mutations were more frequent  
230 than compensatory mutations, irrespective of the host or the AR genetic background  
231 (**Fig. 4d**). Overall 17 genes and 10 intergenic regions were called by natural selection  
232 for global adaptation across the 6 studied mice. Some of these have been shown to be  
233 adaptive when *E. coli* colonizes the gut of streptomycin-treated mice<sup>35,45-47</sup>.

234 The temporal pattern of population genomic variation strongly suggests that clonal  
235 interference between adaptive and compensatory mutations occurs. In some hosts the  
236 emerging compensatory mutations had weaker benefits than other adaptive mutations  
237 (e.g. mutations in *fimE* and *tdcA* reached higher frequencies than compensatory  
238 mutations to either Str<sup>R</sup> or Rif<sup>R</sup>). The observed pattern is also consistent with the  
239 overall mutation rate to compensation being smaller than that of global adaptation to  
240 the gut. *rpoB* and *rpoC* were the two targets for compensation to Rif<sup>R</sup>, with deletions  
241 in *rpoB* being alleles that have not been commonly detected *in vitro*. The three targets  
242 for compensation to Str<sup>R</sup>: in the *rpsE*, *rpsL* and *rpsD* genes have been detected in  
243 previous studies of compensation under laboratory conditions (**Fig. 4d-e and**  
244 **Supplementary Table 5**).

245 Overall these observations are consistent with the observed variation of fitness effects  
246 of AR in the short-term competitions (**Fig. 1b**) and with the results of the simple  
247 theoretical model described above (**Fig. 2-3**), predicting a strong personalized pattern

248 of compensation for deleterious pleiotropic mutations at the initial stages of evolution  
249 (**Fig. 4**).

250

## 251 **DISCUSSION**

252 Many chromosomal encoded AR exhibit a fitness cost when growing in *in vitro*  
253 artificial laboratory environments. How previously measured costs of AR *in vitro*  
254 translate into the natural environments is currently poorly known. Yet, the  
255 quantification of the strength of selection for and against resistance in ecosystems  
256 such as the mammalian gut is critical for understanding the levels of the microbiota  
257 resistome<sup>8</sup>. In the species rich intestinal tract, bacteria ferociously compete for  
258 resources and the environment may not be as constant as that of laboratory settings.  
259 Indeed, we have found that the costs of both single and double resistances *in vitro*  
260 could significantly deviate from their estimated *in vivo* effects, even in the simplest  
261 case of mono-colonized hosts (**Fig. 1b** and **Supplementary Fig. 3**). In the more  
262 relevant model of *E. coli* colonization of a complex gut microbiota with inter-species  
263 interactions, we uncovered that the same AR mutation can have a wide range of  
264 fitness effects in hosts that are genetically identical, eat the same diet and experience  
265 the same environment. Following antibiotic treatment, a given AR mutation showed a  
266 strong deleterious effect in competitive fitness within one host but increased in  
267 frequency in another - a display of antagonistic pleiotropy. A similar finding occurs  
268 when double resistant strains compete with single resistant lineages (**Supplementary**  
269 **Figure 2**). Since the host specific effect is absent in germ-free mice (**Fig. 1c**), our  
270 observations suggest that selection against resistance is acting unequally across mice  
271 due to the presence of the microbiota. In accordance with previous reports<sup>48,49</sup>, a  
272 decrease in microbiota diversity following antibiotic treatment is also seen in our

273 study, as well as a high variance of its composition between mice (**Fig. 1e-f**).  
274 Differences in the composition of the microbiota can lead to differences in metabolic  
275 activity of the whole ecosystem, which in turn will likely result in distinct levels of  
276 inter-species competition for the different gut resources. Since the AR studied here,  
277 involving changes in the ribosome and RNA polymerase, affect metabolism<sup>50-52</sup>, it is  
278 natural to expect that their fitness effects may depend on the microbiota composition,  
279 as observed. Streptomycin resistance mutations can affect translation speed and  
280 accuracy<sup>53</sup>, while certain *rpoB* mutations can affect transcription speed<sup>54</sup> and  
281 fidelity<sup>55,56</sup>. Cellular processes that depend of the effectiveness of transcription and  
282 translation, such as the activation or repression of operons linked to nutrient uptake  
283 and consumption, are likely to be affected, generating distinct consumption rates  
284 when compared with the wild-type strain. Accordingly, the mutations under study  
285 have been shown to change the growth and competitive fitness of bacteria in different  
286 nutritional environments<sup>22</sup>, suggesting that they can change the relative consumption  
287 of different resources in natural environments. By theoretical modeling the effect of  
288 AR mutations in a framework of competition within ecosystems, we found that AR  
289 mutations, which are costly in the absence of interspecies interactions, should entail  
290 variable costs in the context of host-specific microbiota perturbations. The model also  
291 predicted time dependent-selection of the fate of AR, implying that the strength of  
292 selection to lower resistance costs should generally show variation along time within  
293 and between individuals. Such patterns were corroborated by *in vivo* long-term  
294 evolution experiments on three different resistance backgrounds. Notwithstanding  
295 other key simplifications in the model, we also did not explicitly consider the  
296 emergence of compensatory mutations nor the clonal interference pattern observed  
297 during the long-term evolutionary dynamics of *E. coli* resistant strains in the gut. The

298 quantitative understanding of how globally adaptive mutations interfere with  
299 background specific compensatory mutations during the eco-evolutionary dynamics  
300 of gut commensal bacteria after microbiota dysbiosis is an important problem for  
301 future theoretical work, that can illuminate specific *in vivo* experimental evolution  
302 designs.

303 The findings that metabolic adaptations occur in every host, that typical compensatory  
304 mutations may take a long time to reach high frequency, and that reversion to a  
305 sensitive state are not detected, has consequences for the expansion and maintenance  
306 of resistant strains within hosts. A recent study showing that a short-term cefuroxime  
307 treatment can increase the general level of resistance in the human gut microbiota<sup>57</sup>,  
308 corroborates this expectation, although the factorial level of potential causes for such  
309 an effect is enormous when studying AR levels in humans.

310 The dysbiotic period following antibiotic treatment offers a time window of  
311 opportunity for disease causing bacteria to invade the host intestine. The associated  
312 possible reduction in costs of resistance at this critical period offers an important  
313 breach for the maintenance of resistant pathogens, and further difficulties in  
314 elimination of these agents. Yet in the case of AR mutations that affect nutritional  
315 metabolism, an interesting possibility of using specific dietary supplementation could  
316 be considered. As metabolic model predictions from genomic data of strains is rapidly  
317 improving and specific carbon supplementations can sometimes be effective in  
318 changing the frequency of specific strains<sup>58</sup>, hopes that such progress can be  
319 harnessed to lower resistance levels may become within reach.

320 A study with a simplified model microbiota has shown that the presence of a single  
321 gut bacterial species can change the outcome of intra-species competitions<sup>59</sup>.  
322 Therefore, a plausible strategy to eliminate resistant pathogens is to find competitors

323 that will reliably and specifically generate a cost for the resistant strain. Studying the  
324 fitness effects of resistance mutations in the presence of specific gut microbes or  
325 defined collections of microbiota members, and further testing the efficiency of these  
326 strains in dysbiosis models could lead to optimized approaches for selection against  
327 resistance.

328 According to our model, multi-species can coexist when there are, at least, two  
329 resources available for which the different species compete. Importantly, the species  
330 are able to consume both resources, even though they have different abilities to  
331 consume each one. There is evidence that several gut species can use more than one  
332 carbon sugar<sup>60</sup>. Even though carbon-catabolite-repression (CCR) is known to occur in  
333 *E. coli* for carbon sources such as glucose<sup>61</sup>, bacteria can find a multitude of  
334 nutritional niches when colonizing the mammalian gut. Successful species probably  
335 evolved to be versatile enough to switch their realized nutrient niche regularly or to  
336 simultaneously utilize multiple substrates<sup>62</sup>. In agreement, the gene expression  
337 profiles *E. coli* MG1655 grown in mucus (mimicking the gut nutritionally) identified  
338 genes involved in catabolism of several sugars such as N-acetylglucosamine, sialic  
339 acid, glucosamine, fucose, ribose, glucuronate, galacturonate, gluconate, and  
340 maltose<sup>63</sup>.

341 We found evidence for significant antagonistic pleiotropy for AR fitness effects  
342 between hosts. Antagonistic pleiotropy could also occur within a single host intestine,  
343 as individual *E. coli* cells might experience different niches in such structured  
344 environment, while the population as a whole may consume different carbon sources  
345 simultaneously<sup>58</sup>. The simple theoretical model of resource competition helps  
346 explaining how the host-dependent AR costs can arise from general properties of the  
347 ecosystem even without species-specific or cross-feeding interactions. Pairwise cross-

348 feeding interactions between gut bacteria can nevertheless occur<sup>64,65</sup> and higher order  
349 cross-feeding interactions are thought to be involved in complex microbial  
350 communities<sup>66</sup>. While cross-feeding interactions are a feature of the gut ecosystem,  
351 these networks of metabolites produced by bacteria can also be affected by strong  
352 microbiota perturbations. Thus, an altered ability to consume cross-fed resources by  
353 resistant bacteria would lead to the same outcome: a host-specific fitness effect of  
354 resistance mutations in dysbiosis.

355 Recent studies that define the bacterial taxa within human microbiota demonstrate  
356 significant variability between individuals<sup>67,68</sup>. One of these studies<sup>68</sup> was able to track  
357 individuals from hundreds of people by using the microbiota data available in the  
358 “Human Microbiome Project” database. This is strong evidence that our microbiota  
359 has enough unique characteristics to be almost used as a “fingerprint” of an  
360 individual. As the microbiota can affect the cost of resistance, it is likely that the fate  
361 of resistant bacteria in humans is also host-specific. Therefore, depending on  
362 individual microbiomes and resistomes, the fight against antibiotic resistance in the  
363 current era might require personalized medicine.

364

## 365 **METHODS**

### 366 ***E. coli* and mice strains**

367 All of the strains were derived from *Escherichia coli* strain K-12 MG1655. Since the  
368 *gat* operon was observed to be a mutation hotspot under strong selection for our  
369 strains in the mouse gut<sup>35,45</sup>, we pre-adapted our *E. coli* strain to a *gat* negative  
370 phenotype by knocking down the *gatZ* gene permanently. Briefly, P1 transductions  
371 were performed in order to delete the *gatZ* gene from our strains as a pre-adaptive  
372 mutation and strain *E. coli* JW2082-1 from the KEIO collection was used as a donor.

373 The new strains, LC88 and RB929 (*ΔlacIZYA::scar galK::cat-YFP/CFP ΔgatZ::FRT-*  
374 *aph-FRT*), were used as wild-type strains in the competitions. P1 transduction was  
375 also used to insert the point mutation *rpoB*<sup>H526Y</sup> (Rif<sup>R</sup>) in the wild-type background  
376 and to pass the *gatZ* deletion from the wild-type strains to isogenic antibiotic resistant  
377 strains, carrying either the point mutation *rpsL*<sup>K43T</sup> (Str<sup>R</sup>) or both *rpsL*<sup>K43T</sup> and  
378 *rpoB*<sup>H526Y</sup> mutations (Str<sup>R</sup>Rif<sup>R</sup>). The resulting streptomycin resistant (Str<sup>R</sup>) strains  
379 LC81 and LC82 (YFP/CFP, respectively), the rifampicin resistant (Rif<sup>R</sup>) strains  
380 RB933 and LC84b (YFP/CFP, respectively), and the double resistant (Str<sup>R</sup>Rif<sup>R</sup>)  
381 strains LC85, LC86 (YFP/CFP, respectively) were used to colonize the mice and  
382 perform the competitions *in vivo*.

383 Six-to-thirteen week-old female C57BL/6J germ-free (GF) mice were used as hosts  
384 for the *in vivo* competitions in the absence of microbiota, while 6-to-8 week-old  
385 female C57BL/6J specific pathogen free (SPF) mice were used for the *in vivo*  
386 competitions and the evolution experiment in the presence of microbiota. GF mice  
387 were bred and raised at the IGC gnotobiology facility in dedicated axenic isolators  
388 (La Calhene/ORM.) Young adults were transferred into sterile ISOcages (Tecniplast)  
389 before the competition experiments.

390

### 391 ***In vitro* competitions**

392 The strains were streaked from the frozen stocks into LB agar with antibiotics  
393 corresponding to their resistance and incubated at 37°C for 24 hours, followed by  
394 acclimatization for 24h in LB and in minimal media with 0.4% glucose, in 96-well  
395 plates, at 37°C, with shaking (700 rpm). Each resistant strain was mixed in a 1:1 ratio  
396 with the sensitive wild-type, and competitions were performed for 24h in the same  
397 conditions as the acclimatization. To determine the initial and final ratios of resistant



398 and susceptible strains in the competition assays, bacteria were quantified with an  
399 LSR Fortessa flow cytometer using a 96-well plate autosampler. Samples were always  
400 run in the presence of SPHERO (AccuCount 2.0- $\mu\text{m}$  blank particles) in order to  
401 accurately quantify bacterial numbers in the cultures. Briefly, flow cytometry samples  
402 consisted of 180  $\mu\text{l}$  of PBS, 10  $\mu\text{l}$  of SPHERO beads, and 10  $\mu\text{l}$  of a 100-fold dilution  
403 of the bacterial culture in PBS. The bacterial concentration was calculated based on  
404 the known number of beads added. Cyan fluorescent protein (CFP) was excited with a  
405 442-nm laser and measured with a 470/20-nm pass filter. Yellow fluorescent protein  
406 (YFP) was excited using a 488-nm laser and measured using a 530/30-nm pass filter.  
407 The selection coefficient ( $s$ ) of each mutant strain was estimated as the per generation  
408 (number of doublings of the susceptible strain) difference in the ration of the resistant  
409 strain and the reference strain after 24h:  $S = \ln(R_f/R_i)/t$ , where  $t$  corresponds to the  
410 number of generations and  $R_f$  and  $R_i$  to the final and initial ratios between resistant  
411 and reference strains, respectively. The *gat* negative phenotype had no interference in  
412 between the negative epistasis in between resistances<sup>9,22</sup>.

413

#### 414 ***In vivo* competitions**

415 To measure the fitness effects and to evolve the resistant strains in SPF mice, we used  
416 a streptomycin treatment in order to break the colonization resistance. Mice were  
417 separated into individual cages and given autoclaved drinking water containing  
418 streptomycin sulfate (5g/L) for seven days and then mice were given regular  
419 autoclaved drinking water for 2 days, in order to wash out the antibiotic from the gut  
420 and allow for the microbiota stabilization. After 4 hours of starvation for food and  
421 water, the mice were gavaged with 100  $\mu\text{l}$  of a  $\approx 10^9$  cells/ml suspension with a 1:1  
422 ratio of the two competing strains.

423 To make the suspension, the strains were streaked from stocks in LB agar with  
424 antibiotics corresponding to their resistance two days before gavage and incubated for  
425 24 hours, followed by an overnight culture of a single colony for each biological  
426 replicate in BHI (brain heart infusion) media with the corresponding antibiotic. The  
427 cultures were then diluted 100-fold and grown in BHI media until an  $OD_{600nm} \approx 2$ .  
428 Flow cytometry was used to assess the number of cells per growth and therefore  
429 adjust the initial number of cells in order to prepare the suspension for the gavage.  
430 The same protocol was used in order to generate the bacteria suspension for the GF  
431 mice. Mice fecal pellets were collected 4 hours and every 24 after gavage, for 5 days,  
432 suspended and diluted in PBS and plated in LB agar plates. Plates were incubated  
433 overnight and the frequencies of CFP- or YFP-labeled bacteria were assessed by  
434 counting the fluorescent colonies with the help of a fluorescent stereoscope  
435 (SteREOLumar, Carl Zeiss). The samples were also stored in 15% glycerol at  $-80^{\circ}\text{C}$   
436 for future experiments. The selection coefficient (S) per day of each mutant strain was  
437 estimated through the slope of the log-linear regression of the ratio of the resistant  
438 strain and the reference strain from day 1 to day 5. Apart from the streptomycin  
439 treatment to break colonization resistance, the same protocol was used in the  
440 competitions with GF mice.

441

#### 442 **Microbiota analysis**

443 To assess the gut microbiota composition of mice, we extracted DNA from fecal  
444 samples from two experiments: the measurement of fitness costs in SPF mice (**Fig. 1**)  
445 and from the compensatory evolution of the resistant strains (**Fig. 4**). For the analysis  
446 of the microbiota perturbation during the measurement of the fitness costs, fecal  
447 samples were collected from 8 mice belonging to different litters, before the start of

448 the antibiotic treatment and 72 hours after its end, corresponding to the first time-  
449 point on the competition experiments. For samples collected during the *E. coli*  
450 resistant strains compensatory evolution experiments, we characterized the microbiota  
451 context by analyzing the fecal samples collected from 6 female mice from two  
452 different litters (3 per litter) at day 17 of the evolution experiment.

453 Fecal DNA was extracted with a QIAamp DNA Stool MiniKit (Qiagen), according to  
454 the manufacturer's instructions and with an additional step of mechanical disruption<sup>69</sup>.  
455 16S rRNA gene amplification and sequencing was carried out at the Gene Expression  
456 Unit from Instituto Gulbenkian de Ciência, following the service protocol. For each  
457 sample, the V4 region of the 16 S rRNA gene was amplified in triplicate, using the  
458 primer pair F515/R806, under the following PCR cycling conditions: 94 °C for 3 min,  
459 35 cycles of 94 °C for 60 s, 50 °C for 60 s, and 72 °C for 105 s, with an extension step  
460 of 72 °C for 10 min. Samples were then pair-end sequenced on an Illumina MiSeq  
461 Benchtop Sequencer, following Illumina recommendations.

462 QIIME2<sup>70</sup> was used to analyze the 16S rRNA sequences by following the authors'  
463 online tutorials (<https://docs.qiime2.org/2018.11/tutorials/>). Briefly, the demultiplexed  
464 sequences were filtered using the “denoise-single” command of DADA2<sup>71</sup>, and  
465 forward and reverse sequences were trimmed in the position in which the 25<sup>th</sup>  
466 percentile's quality score got below 20. Alpha diversity and ANCOM analysis<sup>72</sup> were  
467 performed as in the QIIME2 tutorial. Beta diversity distances were calculated through  
468 Unweighted Unifrac<sup>73</sup>, and PCoA on the respective distance matrices were performed  
469 using the R software (<http://www.R-project.org>) and the R packages “vegan”  
470 (<https://CRAN.R-project.org/package=vegan>), “BiodiversityR” (<https://CRAN.R-project.org/package=BiodiversityR>) and “RVAideMemoire” (<https://CRAN.R-project.org/package=RVAideMemoire>). For taxonomic analysis, OTU were picked by

473 assigning operational taxonomic units at 97% similarity against the Greengenes  
474 database<sup>74</sup>.

475

#### 476 **Compensatory evolution in SPF mice**

477 To study the adaptation of resistance strains to the gut, three sister mice from 2  
478 different litters were used, for a total of 6 mice. For each resistant genotype, we  
479 colonized 1 mouse from each litter with a mix of YFP and CFP-labeled bacteria. The  
480 whole colonization protocol was identical to the *in vivo* competitions as described for  
481 the SPF mice. Samples were collected 24h after gavage and every 48h thereafter, until  
482 39 days post colonization. All samples were stored in 15% glycerol at -80°C.

483

#### 484 **DNA extractions and whole-genome sequencing analysis**

485 Concentration and purity of DNA were quantified using Qubit and NanoDrop,  
486 respectively. The DNA library construction and sequencing was carried out by the  
487 IGC genomics facility. Each sample was pair-end sequenced on an Illumina MiSeq  
488 Benchtop Sequencer. Standard procedures produced data sets of Illumina paired-end  
489 250 bp read pairs. The reads were filtered using SeqTk version 1.0-r63. The mean  
490 coverage after filtering for the different samples was as follows: 168x and 175x for  
491 Str<sup>R</sup>1 day 19 and day 39, respectively; 238x and 194x for Str<sup>R</sup>2 day 19 and day 39,  
492 respectively; 164x and 159x for Rif<sup>R</sup>1 day 19 and day 39, respectively; 226x and 202x  
493 for Rif<sup>R</sup>2 day 19 and day 39, respectively; 148x and 156x for Str<sup>R</sup> Rif<sup>R</sup>1 day 19 and  
494 day 39, respectively; 213x and 220 for Str<sup>R</sup> Rif<sup>R</sup>2 day 19 and day 39, respectively.  
495 Sequences were analyzed using Breseq version 0.31.1, using *E. coli* K12 genome  
496 NC\_000913.3 as a reference, with the polymorphism option selected, and the  
497 following parameters: (a) rejection of polymorphisms in homopolymers of a length

498 greater than three, (b) rejection of polymorphisms that are not present in at least three  
499 reads in each strand, and (c) rejection of polymorphisms that do not have a p-value for  
500 quality greater than 0.05,(d) rejection of polymorphisms with less than 3 of coverage  
501 in each strand and (e) rejection of polymorphisms with less than 1% frequency. All  
502 other Breseq parameters were used as default. Hits that were present in all of our  
503 ancestral mutants as well as homopolymers were discarded. Hits that were likely to be  
504 due to misalignment of repetitive regions were also discarded. Regarding the  
505 downstream analysis, target genes that appeared only in one sample and had a  
506 frequency lower than 5% were not considered.

507

### 508 **Modeled AR competitions**

509 Numerical simulations were used to confirm the analytical predictions and to  
510 graphically represent the results. The dynamics of M species competing for P  
511 resources follow a recent formalization of the classical MacArthur consumer-resource  
512 model<sup>39</sup>:

$$513 \quad \frac{dn^{(i)}}{dt} = n^{(i)} \left( \sum_{j=1}^P \frac{\gamma \alpha_j^{(i)} S_j}{\sum_{k=1}^M n^{(k)} \alpha_j^{(k)}} - \delta \right), \quad (i=1, \dots, M)$$

514 Where  $n^{(i)}(t)$  is the density of species  $i$ ,  $\alpha_j^{(i)}$  is the consumption rate of substrate  $j$  by  
515 species  $i$ ,  $S_j$  is the constant substrate  $j$  supply,  $\gamma$  is the yield and  $\delta$  is the microbial  
516 death rate. A detailed description of the parameter choice and the algorithm is given  
517 in the supplementary information. The implementation of the competitions and the  
518 graphical resolution of the two-resource scenario were done in RStudio 1.1.463 and  
519 the source code is available upon request to the authors.

520

### 521 **Statistical analysis**

522 The selection coefficient of the *in vivo* competitions was tested in R software, through  
523 an F-statistic on a predictive linear model of the mutant/sensitive or double  
524 mutant/single mutant ratio over time, generated through the observed ratio on sampled  
525 time-points from 24, 48, 72, 96 and 120 hours after gavage. The null hypothesis is  
526 that the slope, which is an estimation of the selection coefficient, is equal to 0. When  
527 the null hypothesis was rejected,  $p\text{-value} < 0.05$ , the mutant was considered to have a  
528 cost if the slope of the model was negative and to have a fitness benefit if the slope  
529 was positive. F tests were performed to analyze the variance in between hosts.  
530 Normality of each treatment was tested through with Shapiro Wilk test and normality  
531 of the treatments involving competitions in the presence of microbiota was further  
532 tested through Kolmogorov-Smirnov test.

533

#### 534 **Ethics statement**

535 This research project was ethically reviewed and approved by the Ethics Committee  
536 of the Instituto Gulbenkian de Ciência (license reference: A009.2018) and by the  
537 Portuguese National Entity that regulates the use of laboratory animals (DGAV –  
538 Direção Geral de Alimentação e Veterinária (license reference: 008958). All  
539 experiments conducted on animals followed the Portuguese (Decreto-Lei nº  
540 113/2013) and European (Directive 2010/63/EU) legislations, concerning housing,  
541 husbandry and animal welfare.

542

#### 543 **ACKNOWLEDGMENTS**

544 LLC, PD and MA were supported by “Fundação para a Ciência e Tecnologia” (FCT),  
545 fellowships SFRH/BPD/118474/2016, PD/BD/106003/2014 and  
546 PD/BD/138735/2018, respectively. Research was supported by project

547 JPIAMR/0001/2016-ERA NET and ONEIDA project (LISBOA-01-0145-FEDER-  
548 016417) co-funded by FEEI – “Fundos Europeus Estruturais e de Investimento” from  
549 “Programa Operacional Regional Lisboa 2020”, and by national funds from FCT. We  
550 would like to thank the personnel of the IGC Rodent Facility, Genomic Facility and  
551 the Bioinformatics Unit for their assistance.

552

### 553 **COMPETING INTERESTS**

554 We have no competing interests.

555

### 556 **AUTHOR CONTRIBUTIONS**

557 LLC and PD performed the experiments. MA and IG designed the model which was  
558 developed by MA. LLC, PD and IG analyzed the results. IG coordinated the study.  
559 All authors contributed in the writing of the manuscript and gave final approval for  
560 publication.

561

562 **REFERENCES**

- 563 1. *Antimicrobial resistance: global report on surveillance*. (World Health  
564 Organization, 2014).
- 565 2. Gullberg, E. *et al.* Selection of resistant bacteria at very low antibiotic  
566 concentrations. *PLoS Pathog.* **7**, e1002158 (2011).
- 567 3. MacLean, R. C. & Vogwill, T. Limits to compensatory adaptation and the  
568 persistence of antibiotic resistance in pathogenic bacteria. *Evol Med Public*  
569 *Health* **2015**, 4–12 (2015).
- 570 4. Bhullar, K. *et al.* Antibiotic resistance is prevalent in an isolated cave  
571 microbiome. *PLoS ONE* **7**, e34953 (2012).
- 572 5. Forsberg, K. J. *et al.* The shared antibiotic resistome of soil bacteria and  
573 human pathogens. *Science* **337**, 1107–1111 (2012).
- 574 6. Hu, Y. *et al.* Metagenome-wide analysis of antibiotic resistance genes in a  
575 large cohort of human gut microbiota. *Nat Commun* **4**, 2151 (2013).
- 576 7. Andersson, D. I. & Hughes, D. Antibiotic resistance and its cost: is it possible  
577 to reverse resistance? *Nat. Rev. Microbiol.* **8**, 260–271 (2010).
- 578 8. Durão, P., Balbontín, R. & Gordo, I. Evolutionary Mechanisms Shaping the  
579 Maintenance of Antibiotic Resistance. *Trends in Microbiology* **26**, 677–691  
580 (2018).
- 581 9. Trindade, S. *et al.* Positive Epistasis Drives the Acquisition of Multidrug  
582 Resistance. *PLoS Genet* **5**, e1000578 (2009).
- 583 10. Miskinyte, M. & Gordo, I. Increased survival of antibiotic-resistant  
584 *Escherichia coli* inside macrophages. *Antimicrob. Agents Chemother.* **57**, 189–  
585 195 (2013).



- 586 11. Durão, P., Güleresi, D., Proença, J. & Gordo, I. Enhanced Survival of Rifampin-  
587 and Streptomycin-Resistant *Escherichia coli* Inside Macrophages. *Antimicrob.*  
588 *Agents Chemother.* **60**, 4324–4332 (2016).
- 589 12. Reynolds, M. G. Compensatory evolution in rifampin-resistant *Escherichia*  
590 *coli*. *Genetics* **156**, 1471–1481 (2000).
- 591 13. Enne, V. I., Bennett, P. M., Livermore, D. M. & Hall, L. M. C. Enhancement of  
592 host fitness by the *sul2*-coding plasmid p9123 in the absence of selective  
593 pressure. *J. Antimicrob. Chemother.* **53**, 958–963 (2004).
- 594 14. Gagneux, S. *et al.* The competitive cost of antibiotic resistance in  
595 *Mycobacterium tuberculosis*. *Science* **312**, 1944–1946 (2006).
- 596 15. Melnyk, A. H., Wong, A. & Kassen, R. The fitness costs of antibiotic resistance  
597 mutations. *Evol Appl* **8**, 273–283 (2015).
- 598 16. Seppälä, H. *et al.* The Effect of Changes in the Consumption of Macrolide  
599 Antibiotics on Erythromycin Resistance in Group A Streptococci in Finland.  
600 *New England Journal of Medicine* **337**, 441–446 (1997).
- 601 17. Enne, V. I., Livermore, D. M., Stephens, P. & Hall, L. M. Persistence of  
602 sulphonamide resistance in *Escherichia coli* in the UK despite national  
603 prescribing restriction. *Lancet* **357**, 1325–1328 (2001).
- 604 18. Bean, D. C., Livermore, D. M., Papa, I. & Hall, L. M. C. Resistance among  
605 *Escherichia coli* to sulphonamides and other antimicrobials now little used in  
606 man. *J. Antimicrob. Chemother.* **56**, 962–964 (2005).
- 607 19. Gottesman, B. S., Carmeli, Y., Shitrit, P. & Chowers, M. Impact of quinolone  
608 restriction on resistance patterns of *Escherichia coli* isolated from urine by  
609 culture in a community setting. *Clin. Infect. Dis.* **49**, 869–875 (2009).

- 610 20. Trindade, S., Sousa, A. & Gordo, I. Antibiotic resistance and stress in the light  
611 of Fisher's model. *Evolution* **66**, 3815–3824 (2012).
- 612 21. Hall, A. R., Angst, D. C., Schiessl, K. T. & Ackermann, M. Costs of antibiotic  
613 resistance - separating trait effects and selective effects. *Evol Appl* **8**, 261–272  
614 (2015).
- 615 22. Durão, P., Trindade, S., Sousa, A. & Gordo, I. Multiple Resistance at No Cost:  
616 Rifampicin and Streptomycin a Dangerous Liaison in the Spread of Antibiotic  
617 Resistance. *Mol. Biol. Evol.* **32**, 2675–2680 (2015).
- 618 23. Silva, R. F. *et al.* Pervasive sign epistasis between conjugative plasmids and  
619 drug-resistance chromosomal mutations. *PLoS Genet.* **7**, e1002181 (2011).
- 620 24. Knopp, M. & Andersson, D. I. Predictable Phenotypes of Antibiotic Resistance  
621 Mutations. *mBio* **9**, e00770-18 (2018).
- 622 25. Roux, D. *et al.* Fitness cost of antibiotic susceptibility during bacterial  
623 infection. *Sci Transl Med* **7**, 297ra114 (2015).
- 624 26. Luo, N. *et al.* Enhanced in vivo fitness of fluoroquinolone-resistant  
625 *Campylobacter jejuni* in the absence of antibiotic selection pressure. *Proc.*  
626 *Natl. Acad. Sci. U.S.A.* **102**, 541–546 (2005).
- 627 27. Koch, G. *et al.* Evolution of resistance to a last-resort antibiotic in  
628 *Staphylococcus aureus* via bacterial competition. *Cell* **158**, 1060–1071  
629 (2014).
- 630 28. López-Rojas, R. *et al.* Impaired virulence and in vivo fitness of colistin-  
631 resistant *Acinetobacter baumannii*. *J. Infect. Dis.* **203**, 545–548 (2011).
- 632 29. Björkholm, B. *et al.* Mutation frequency and biological cost of antibiotic  
633 resistance in *Helicobacter pylori*. *Proc. Natl. Acad. Sci. U.S.A.* **98**, 14607–  
634 14612 (2001).

- 635 30. Warner, D. M., Folster, J. P., Shafer, W. M. & Jerse, A. E. Regulation of the MtrC-  
636 MtrD-MtrE efflux-pump system modulates the in vivo fitness of *Neisseria*  
637 *gonorrhoeae*. *J. Infect. Dis.* **196**, 1804–1812 (2007).
- 638 31. Björkman, J., Hughes, D. & Andersson, D. I. Virulence of antibiotic-resistant  
639 *Salmonella typhimurium*. *PNAS* **95**, 3949–3953 (1998).
- 640 32. Barreto, Â. *et al.* Detection of antibiotic resistant *E. coli* and *Enterococcus* spp.  
641 in stool of healthy growing children in Portugal. *Journal of Basic Microbiology*  
642 **49**, 503–512 (2009).
- 643 33. Hong, S. *et al.* Genetic characterization of atypical *Shigella flexneri* isolated in  
644 Korea. *J. Microbiol. Biotechnol.* **20**, 1457–1462 (2010).
- 645 34. Rahmani, F., Fooladi, A. A. I., Marashi, S. M. A. & Nourani, M. R. Drug resistance  
646 in *Vibrio cholerae* strains isolated from clinical specimens. *Acta Microbiol*  
647 *Immunol Hung* **59**, 77–84 (2012).
- 648 35. Barroso-Batista, J. *et al.* The First Steps of Adaptation of *Escherichia coli* to  
649 the Gut Are Dominated by Soft Sweeps. *PLOS Genetics* **10**, e1004182 (2014).
- 650 36. Stebbins, R. B., Graessle, O. E. & Robinson, H. J. Studies on the absorption and  
651 excretion of streptomycin in animals. *Proc. Soc. Exp. Biol. Med.* **60**, 68–73  
652 (1945).
- 653 37. Barroso-Batista, J., Demengeot, J. & Gordo, I. Adaptive immunity increases the  
654 pace and predictability of evolutionary change in commensal gut bacteria.  
655 *Nature Communications* **6**, 8945 (2015).
- 656 38. Coyte, K. Z., Schluter, J. & Foster, K. R. The ecology of the microbiome:  
657 Networks, competition, and stability. *Science* **350**, 663–666 (2015).
- 658 39. Posfai, A., Taillefumier, T. & Wingreen, N. S. Metabolic Trade-Offs Promote  
659 Diversity in a Model Ecosystem. *Phys Rev Lett* **118**, 028103 (2017).

- 660 40. Ley, R. E. *et al.* Obesity alters gut microbial ecology. *Proc. Natl. Acad. Sci. U.S.A.*  
661 **102**, 11070–11075 (2005).
- 662 41. Ubeda, C. *et al.* Familial transmission rather than defective innate immunity  
663 shapes the distinct intestinal microbiota of TLR-deficient mice. *J. Exp. Med.*  
664 **209**, 1445–1456 (2012).
- 665 42. Brandis, G., Wrande, M., Liljas, L. & Hughes, D. Fitness-compensatory  
666 mutations in rifampicin-resistant RNA polymerase. *Mol. Microbiol.* **85**, 142–  
667 151 (2012).
- 668 43. Maisnier-Patin, S., Berg, O. G., Liljas, L. & Andersson, D. I. Compensatory  
669 adaptation to the deleterious effect of antibiotic resistance in *Salmonella*  
670 typhimurium. *Mol. Microbiol.* **46**, 355–366 (2002).
- 671 44. Moura de Sousa, J., Balbontín, R., Durão, P. & Gordo, I. Multidrug-resistant  
672 bacteria compensate for the epistasis between resistances. *PLoS Biol.* **15**,  
673 e2001741 (2017).
- 674 45. Lourenço, M. *et al.* A Mutational Hotspot and Strong Selection Contribute to  
675 the Order of Mutations Selected for during *Escherichia coli* Adaptation to the  
676 Gut. *PLOS Genetics* **12**, e1006420 (2016).
- 677 46. Frazao, N., Sousa, A., Lassig, M. & Gordo, I. Sex overrides mutation in  
678 *Escherichia coli* colonizing the gut. *bioRxiv* 384875 (2018).  
679 doi:10.1101/384875
- 680 47. Ghalayini, M. *et al.* Evolution of a Dominant Natural Isolate of *Escherichia coli*  
681 in the Human Gut over the Course of a Year Suggests a Neutral Evolution  
682 with Reduced Effective Population Size. *Appl Environ Microbiol* **1**, (2018).

- 683 48. Jakobsson, H. E. *et al.* Short-Term Antibiotic Treatment Has Differing Long-  
684 Term Impacts on the Human Throat and Gut Microbiome. *PLOS ONE* **5**, e9836  
685 (2010).
- 686 49. Jernberg, C., Löfmark, S., Edlund, C. & Jansson, J. K. Long-term ecological  
687 impacts of antibiotic administration on the human intestinal microbiota.  
688 *ISME J* **1**, 56–66 (2007).
- 689 50. Qi, Q., Preston, G. M. & MacLean, R. C. Linking System-Wide Impacts of RNA  
690 Polymerase Mutations to the Fitness Cost of Rifampin Resistance in  
691 *Pseudomonas aeruginosa*. *mBio* **5**, e01562-14 (2014).
- 692 51. Barnard, A. M. L., Simpson, N. J. L., Lilley, K. S. & Salmond, G. P. C. Mutations in  
693 rpsL that confer streptomycin resistance show pleiotropic effects on  
694 virulence and the production of a carbapenem antibiotic in *Erwinia*  
695 *carotovora*. *Microbiology (Reading, Engl.)* **156**, 1030–1039 (2010).
- 696 52. Robinson, L. J., Cameron, A. D. S. & Stavriniades, J. Spontaneous and on point:  
697 Do spontaneous mutations used for laboratory experiments cause pleiotropic  
698 effects that might confound bacterial infection and evolution assays? *FEMS*  
699 *Microbiol. Lett.* **362**, (2015).
- 700 53. Ruusala, T., Andersson, D., Ehrenberg, M. & Kurland, C. G. Hyper-accurate  
701 ribosomes inhibit growth. *EMBO J.* **3**, 2575–2580 (1984).
- 702 54. Libby, R. T., Nelson, J. L., Calvo, J. M. & Gallant, J. A. Transcriptional  
703 proofreading in *Escherichia coli*. *EMBO J* **8**, 3153–3158 (1989).
- 704 55. Blank, A., Gallant, J. A., Burgess, R. R. & Loeb, L. A. An RNA polymerase mutant  
705 with reduced accuracy of chain elongation. *Biochemistry* **25**, 5920–5928  
706 (1986).

- 707 56. Strathern, J. N., Jin, D. J., Court, D. L. & Kashlev, M. Isolation and  
708 characterization of transcription fidelity mutants. *Biochim. Biophys. Acta*  
709 **1819**, 694–699 (2012).
- 710 57. Li, J. *et al.* Antibiotic treatment drives the diversification of the human gut  
711 resistome. *bioRxiv* 537670 (2019). doi:10.1101/537670
- 712 58. Sousa, A. *et al.* Recurrent Reverse Evolution Maintains Polymorphism after  
713 Strong Bottlenecks in Commensal Gut Bacteria. *Mol Biol Evol* **34**, 2879–2892  
714 (2017).
- 715 59. Muinck, E. J. de *et al.* Context-Dependent Competition in a Model Gut  
716 Bacterial Community. *PLOS ONE* **8**, e67210 (2013).
- 717 60. Tramontano, M. *et al.* Nutritional preferences of human gut bacteria reveal  
718 their metabolic idiosyncrasies. *Nat Microbiol* **3**, 514–522 (2018).
- 719 61. Görke, B. & Stülke, J. Carbon catabolite repression in bacteria: many ways to  
720 make the most out of nutrients. *Nat. Rev. Microbiol.* **6**, 613–624 (2008).
- 721 62. Kovárová-Kovar, K. & Egli, T. Growth kinetics of suspended microbial cells:  
722 from single-substrate-controlled growth to mixed-substrate kinetics.  
723 *Microbiol. Mol. Biol. Rev.* **62**, 646–666 (1998).
- 724 63. Chang, D.-E. *et al.* Carbon nutrition of *Escherichia coli* in the mouse intestine.  
725 *PNAS* **101**, 7427–7432 (2004).
- 726 64. Belenguer, A. *et al.* Two routes of metabolic cross-feeding between  
727 *Bifidobacterium adolescentis* and butyrate-producing anaerobes from the  
728 human gut. *Appl. Environ. Microbiol.* **72**, 3593–3599 (2006).
- 729 65. Samuel, B. S. & Gordon, J. I. A humanized gnotobiotic mouse model of host-  
730 archaeal-bacterial mutualism. *Proc. Natl. Acad. Sci. U.S.A.* **103**, 10011–10016  
731 (2006).

- 732 66. Goldford, J. E. *et al.* Emergent simplicity in microbial community assembly.  
733 *Science* **361**, 469–474 (2018).
- 734 67. Filippo, C. D. *et al.* Impact of diet in shaping gut microbiota revealed by a  
735 comparative study in children from Europe and rural Africa. *PNAS* **107**,  
736 14691–14696 (2010).
- 737 68. Franzosa, E. A. *et al.* Identifying personal microbiomes using metagenomic  
738 codes. *PNAS* **112**, E2930–E2938 (2015).
- 739 69. Thompson, J. A., Oliveira, R. A., Djukovic, A., Ubeda, C. & Xavier, K. B.  
740 Manipulation of the quorum sensing signal AI-2 affects the antibiotic-treated  
741 gut microbiota. *Cell Rep* **10**, 1861–1871 (2015).
- 742 70. Caporaso, J. G. *et al.* QIIME allows analysis of high-throughput community  
743 sequencing data. *Nat Methods* **7**, 335–336 (2010).
- 744 71. Callahan, B. J. *et al.* DADA2: High-resolution sample inference from Illumina  
745 amplicon data. *Nature Methods* **13**, 581–583 (2016).
- 746 72. Mandal, S. *et al.* Analysis of composition of microbiomes: a novel method for  
747 studying microbial composition. *Microb. Ecol. Health Dis.* **26**, 27663 (2015).
- 748 73. Lozupone, C. & Knight, R. UniFrac: a New Phylogenetic Method for Comparing  
749 Microbial Communities. *Appl Environ Microbiol* **71**, 8228–8235 (2005).
- 750 74. DeSantis, T. Z. *et al.* Greengenes, a chimera-checked 16S rRNA gene database  
751 and workbench compatible with ARB. *Appl. Environ. Microbiol.* **72**, 5069–  
752 5072 (2006).
- 753
- 754

755 **FIGURE LEGENDS**

756 **Figure 1- Effect of microbiota on the fitness costs of resistances. (a)** Scheme of the  
757 experimental design to measure the fitness effect of AR *in vivo*. Mice with their  
758 natural microbiota were given a one-week course of streptomycin treatment, after  
759 which the antibiotic was removed from the water. Two days post-treatment mice were  
760 fed with a mixture of sensitive and AR *E. coli* strains, isogenic and marked with YFP  
761 and CFP respectively. The temporal dynamics of the AR frequency was estimated  
762 from plating of fecal samples daily. **(b,c)** The fitness effect of streptomycin resistance,  
763 coded by *rpsL*<sup>K43T</sup> mutation (Str<sup>R</sup>), rifampicin resistance, coded by *rpoB*<sup>H526Y</sup> mutation  
764 (Rif<sup>R</sup>), and the *rpsL*<sup>K43T</sup>*rpoB*<sup>H526Y</sup> double mutant (Str<sup>R</sup>Rif<sup>R</sup>) under competition against  
765 a sensitive background in the presence of a diverse microbiota **(b)** and in the absence  
766 of inter-species interactions **(c)**. **(d)** Boxplot of the mean and variance of the fitness  
767 costs of resistance measured in mice mono-colonized and with a complex microbiota.  
768 **(e)** Microbiota beta diversity visualization by principal coordinate analysis (PCoA)  
769 based on Unweighted UniFrac distance before and after antibiotic treatment. Ellipses  
770 represent the standard deviation of point scores with a 95% confidence limit for each  
771 group (ANOSIM test,  $p < 0.05$ ). **(f)** Microbiota composition as relative OTU  
772 abundance assayed by 16S rRNA amplicon sequencing and clustered at the phylum  
773 level (colored segments) in different mice after antibiotic treatment displaying the  
774 broader diversity across hosts observed in the PCoA.

775

776 **Figure 2 – Multi-species ecological model of pleiotropic AR mutations and the**  
777 **effect of a stable microbiome. (a)** Schematic of the model with two resources and  
778 multiple species. Each species  $i$  (represented by a given color) is characterized by its  
779 ability of consuming resources ( $S_1$  and  $S_2$ ), encoded by the traits  $\alpha_1^{(i)}, \alpha_2^{(i)}$



780 (represented by resource-specific shapes around each cell). **(b)** Species 2-D  
781 phenotypic space assuming a metabolic trade-off (species lie on the diagonal (see  
782 Supplementary Text)) to allow an equilibrium species rich state. **(c)** The relative  
783 fitness of a mutant in the presence of a stable microbiota ( $M$ ),  $s_{M^*}$ , is time-independent  
784 and independent of the specific composition of  $M$ . It however can be buffered or  
785 amplified by the microbiota according to the specific values of the mutation effect  
786  $(\Delta_1, \Delta_2)$ : when the trait ratio remains unchanged (e.g. Mutant  $x$ ),  $s$  is not affected by  
787 other species, otherwise the cost can increase (e.g. Mutant  $z$ ) or be buffered by the  
788 microbiota (e.g. Mutant  $y$ ). **(d)** The probability of buffering increases with the  
789 distance of the WT to the theoretical optimal (yellow square in panel b,  
790 **Supplementary Text, eq8**).

791

792 **Figure 3 – A general ecological model predicts time-dependent and host-specific**  
793 **selection on AR after antibiotic treatment. (a)** Example of two microbiomes where  
794 a perturbation leads to functional distinct unbalances. Species in different colors with  
795 different relative abundances (represented as different areas of circles or triangles), at  
796 the colonization time; at equilibrium  $e_1=e_2$  (Supplementary Text). **(b)** Selection  
797 depends on the mutation effect (mutant  $x, y$ , or  $z$ ) and on the microbiome composition  
798 ( $s_a$  or  $s_b$ ): for mutant  $x$ , which has same trait ratio as the WT, there is no time or  
799 microbiome dependence, whereas mutations  $y$  and  $z$  have opposite behaviors in the  
800 short time dynamics: selection is positive or negative depending on the microbial  
801 community. **(c)** Time-dependence of selection at short and long time-scales. As time  
802 passes and the microbiome moves towards equilibrium selection tends to a constant  
803 negative value (**Fig. 2c**): example of the cost dynamics of mutant  $z$  within 100

804 simulated microbiomes (equivalent dynamics but for mutants  $x$  and  $y$  in  
805 **Supplementary Fig. 6).**

806

807 **Figure 4 - Dynamics and genetic basis of compensatory evolution of AR strains**

808 **across hosts. (a)** Experimental set up to study the adaption pattern of resistant strains

809 ( $\text{Str}^{\text{R}}$ ,  $\text{Rif}^{\text{R}}$  and  $\text{Str}^{\text{R}}\text{Rif}^{\text{R}}$ ) after an antibiotic perturbation. Mice from the same litter

810 were co-housed for five weeks to homogenize the microbiota across litters.

811 Afterwards, mice from the two different litters followed the same colonization

812 resistance protocol as seen in Figure 1A and then used to follow adaptation of each of

813 the resistant backgrounds (see Methods) for 6 weeks. Fecal samples were collected

814 whole genome sequencing of populations and 16S. **(b)** Microbiota composition at the

815 phylum level of the mice from the two different litters 3 weeks after colonization.

816 Mice from the same litter cluster together and have a more similar microbiota. **(c)**

817 Comparison of the number of putative adaptive and compensatory mutations present

818 in the adapted resistant populations after 3 and 6 weeks in the mice gut with different

819 microbiotas. **(d)** Frequency of the detected adaptive and compensatory mutations at

820 week 3 and week 6. **(e)** Genetic basis of the bona fide compensatory mutations

821 detected after 3 or 6 weeks of adaptation in the gut.

822

823 FIGURES

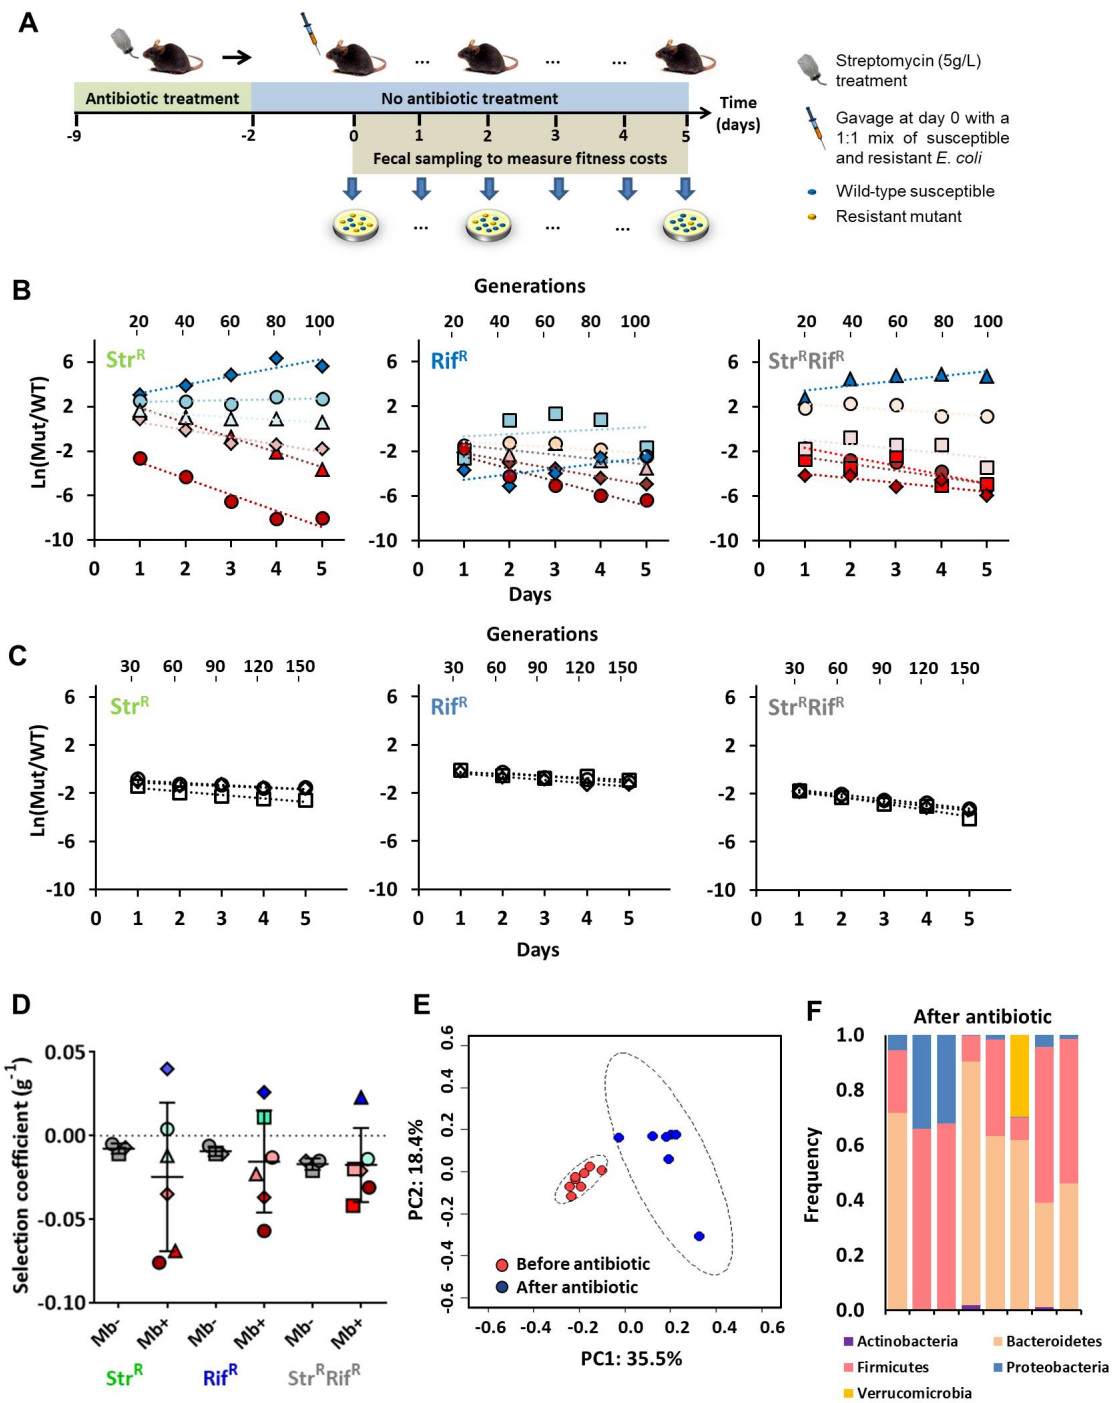

824

825

826

827

828

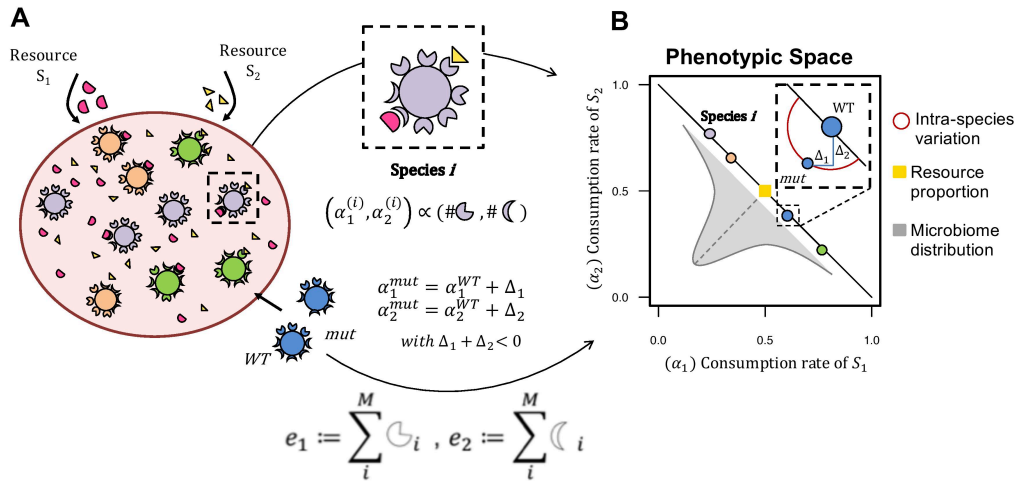

**Effect of a Stable Microbiome**       $s_{M^*} = \Delta_1 + \Delta_2$

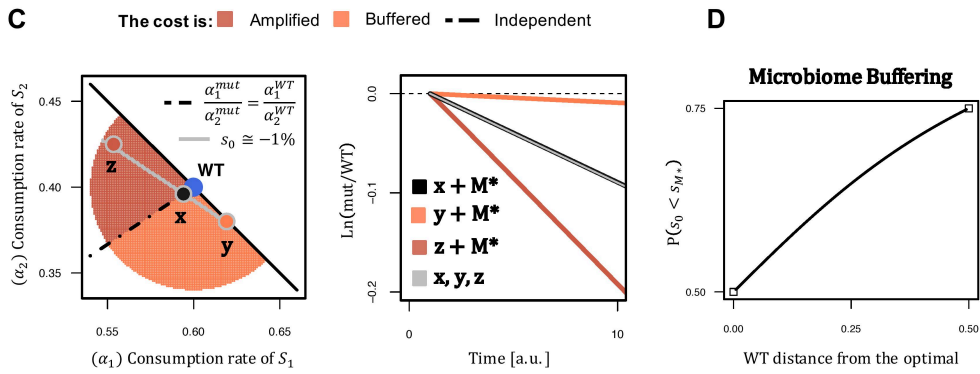

829

830

831

832

833

834

835

836

837

838

839

840

## A Perturbed Microbiomes

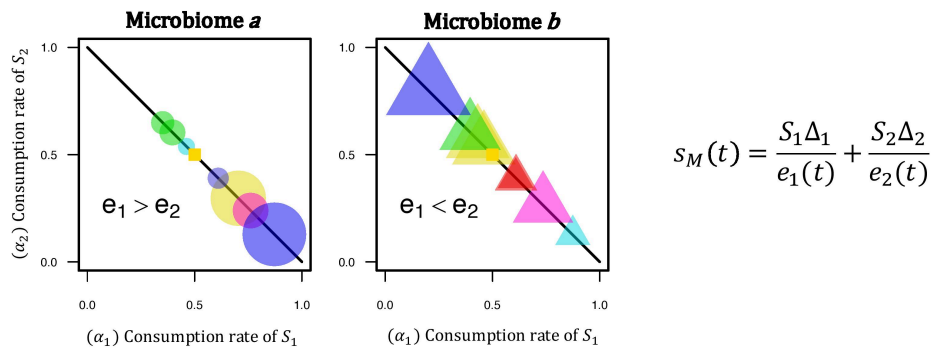

## B

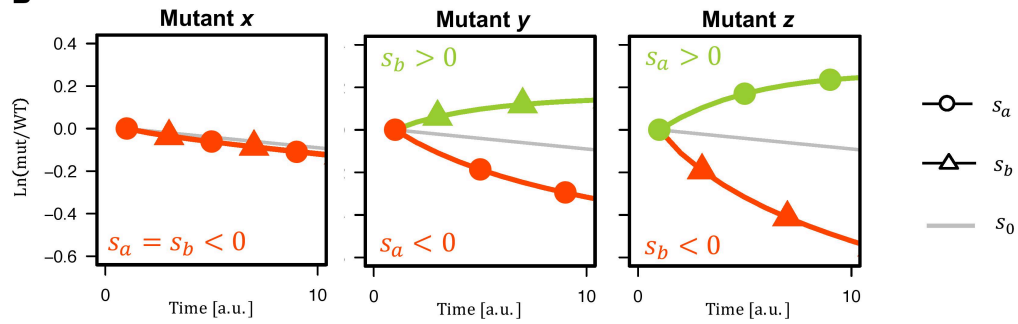

## C Towards Equilibrium $s_M(t) \rightarrow s_M^*$

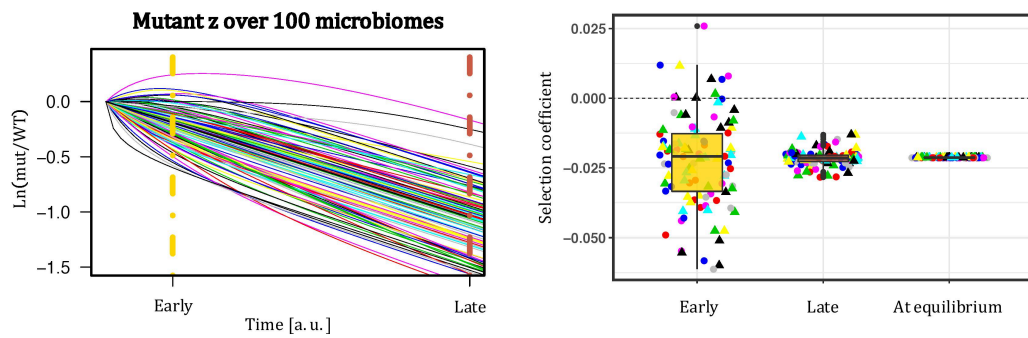

841

842

843

844

845

846

847

848

849

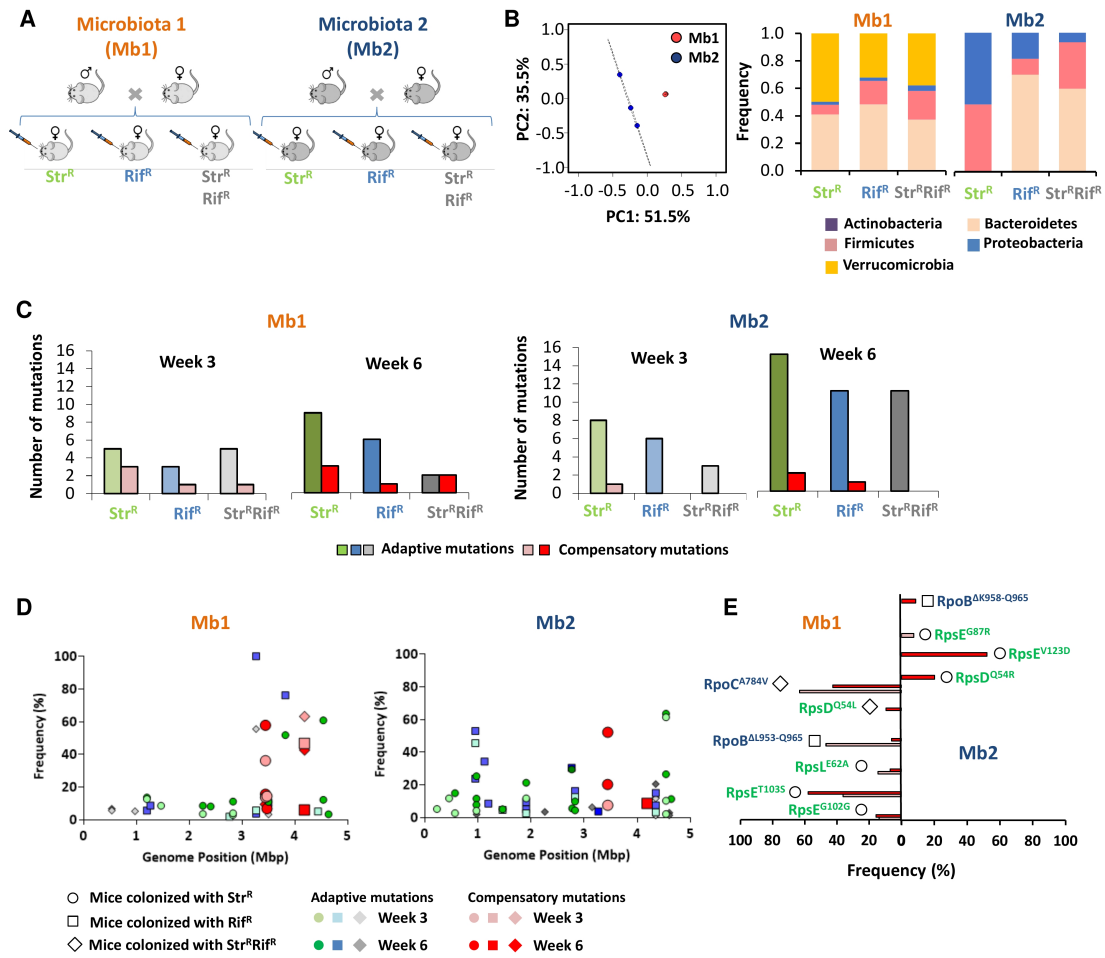

850

851
